# Supplementary material
Source: PubMed Central journal article supplement (PMC3118972)

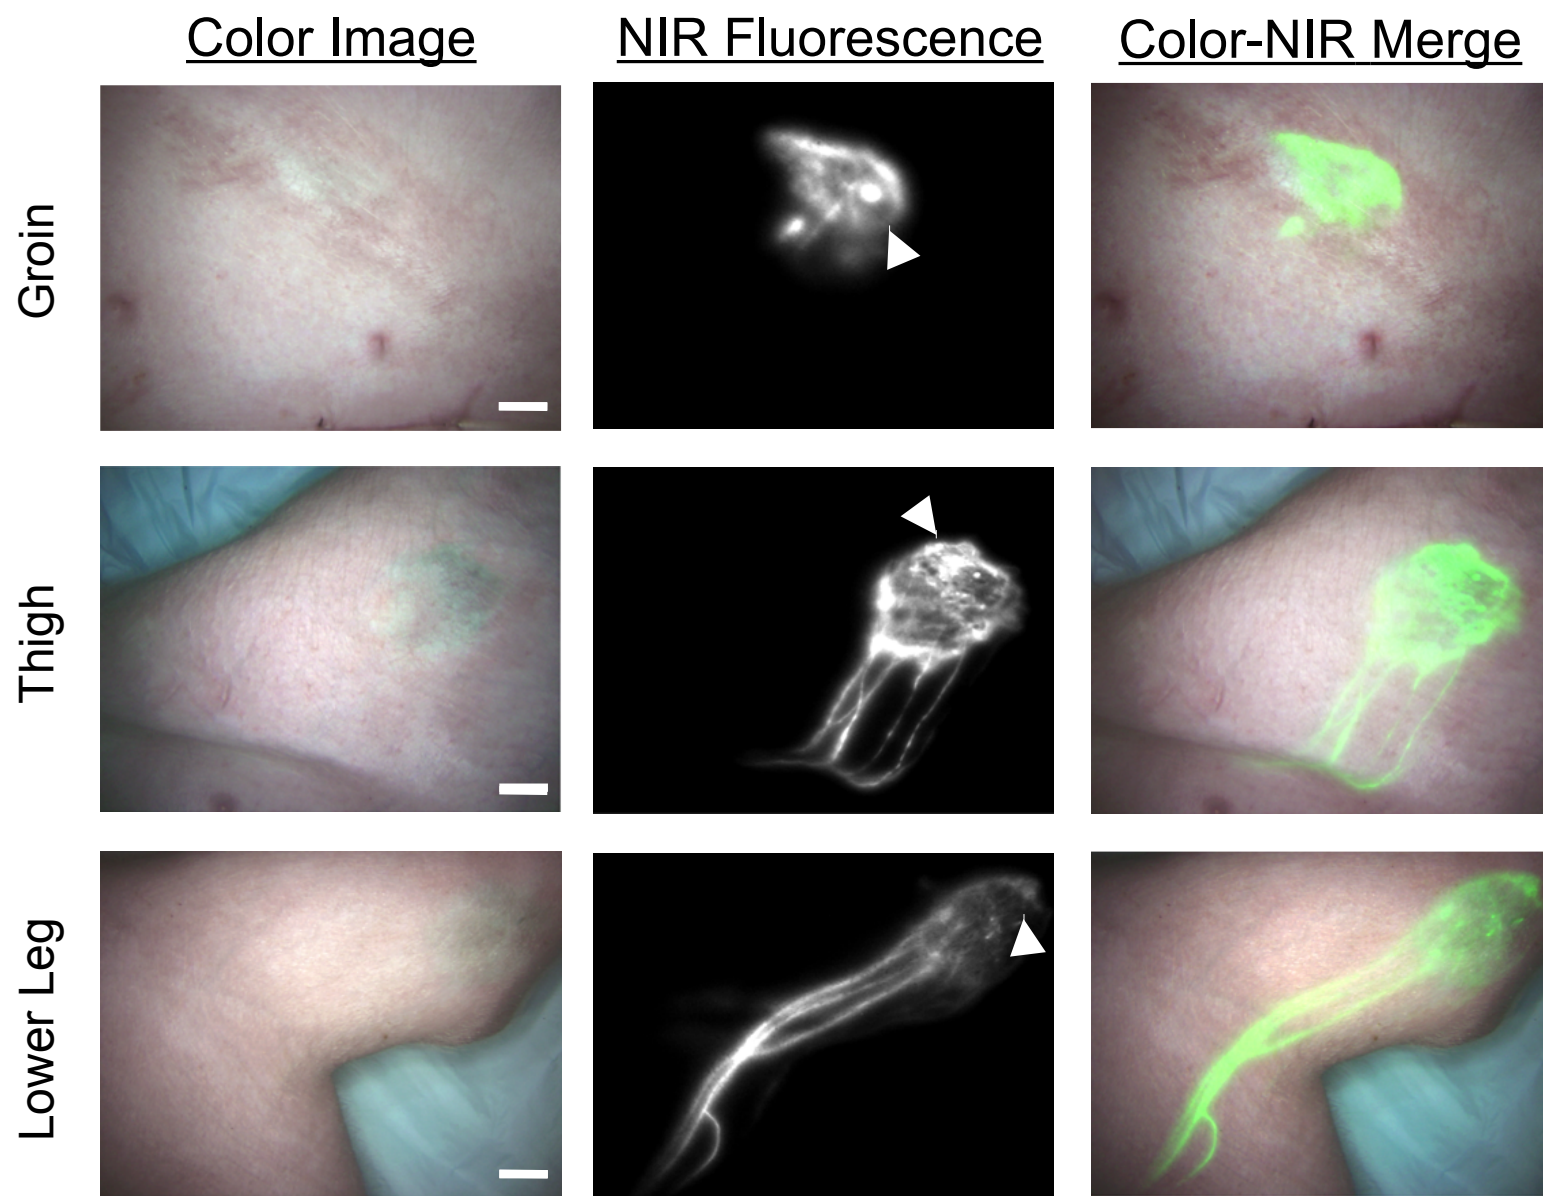

Supplement: NIHMS277065-supplement-Supplementary_Figure_1.pdf [file NIHMS277065-supplement-Supplementary_Figure_1.pdf]

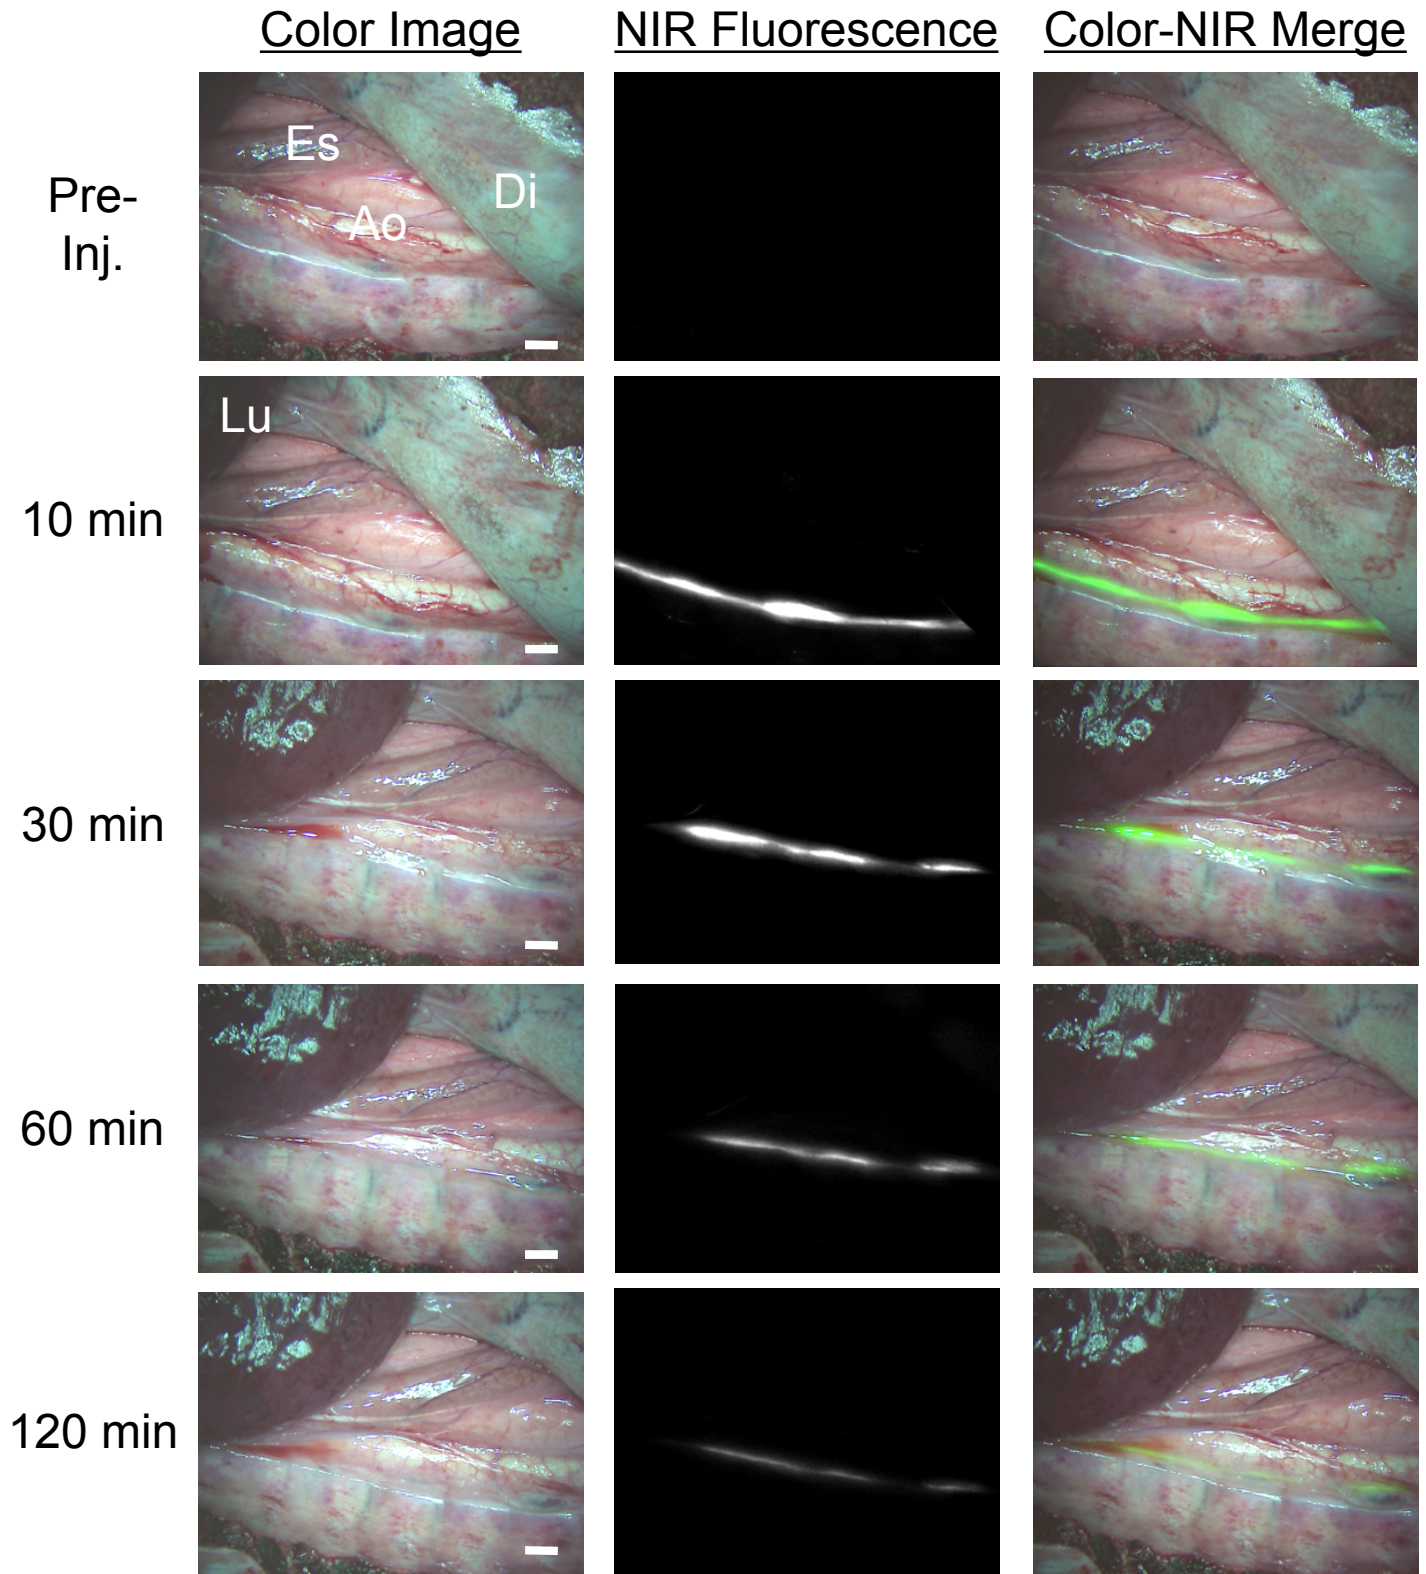

Supplement: NIHMS277065-supplement-Supplementary_Figure_2.pdf [file NIHMS277065-supplement-Supplementary_Figure_2.pdf]
